# Supplementary material
Source: publisher site journal article supplement (https://www.spandidos-publications.com/7958/downloadSupplementary)
Supplement: Supplementary file 1 [file downloadSupplementary]

## Sheet: Sheet1
Table SI. Key hydrogen bonds and hydrophobic interactions between atorvastatin and potential target gene proteins predicted by molecular docking.
Protein	Residues	Atorvastatin atoms involved	Interaction type	Distance（Å）
MMP-2	SER-141	O1	Hydrogen bond	2.3
MMP-2	PHE-4	C27	Hydrophobic contact	3.9
MMP-2	LEU-82	C31	Hydrophobic contact	4
MMP-2	LEU-83	C21	Hydrophobic contact	3.7
MMP-2	ALA-84	C13	Hydrophobic contact	4.1
MMP-2	PHE-87	C19	Hydrophobic contact	3.6
MMP-2	PRO-141	C26	Hydrophobic contact	4.2
IL-6	PHE-405	O1	Hydrogen bond	3
IL-6	PHE-261	C13	Hydrophobic contact	3.6
IL-6	PHE-346	C27	Hydrophobic contact	3.8
IL-6	ILE-349	C21	Hydrophobic contact	3.5
IL-6	VAL-378	C19	Hydrophobic contact	4
IL-6	ILE-403	C31	Hydrophobic contact	3.7
MMP-9	ILE-403	O1	Hydrogen bond	2.1
MMP-9	PHE-405	O2	Hydrogen bond	2.9
MMP-9	PHE-261	C17	Hydrophobic contact	3.6
MMP-9	PHE-346	C25	Hydrophobic contact	3.8
MMP-9	ILE-349	C30	Hydrophobic contact	3.5
MMP-9	VAL-378	C21	Hydrophobic contact	4
MMP-9	PHE B-494	C19	Hydrophobic contact	3.7
MMP-9	PHE B-495	C27	Hydrophobic contact	3.9
MMP-9	ILE B-496	C22	Hydrophobic contact	3.6
SERPINE-1	TRP-175	O1	Hydrogen bond	2.8
SERPINE-1	PHE-179	O2	Hydrogen bond	3.2
SERPINE-1	PHE-208	O3	Hydrogen bond	3.3
SERPINE-1	VAL-197	C21	Hydrophobic contact	3.8
SERPINE-1	TRP-175	C19/C20	Hydrophobic contact	3.7
SERPINE-1	PHE-179	C18/C24	Hydrophobic contact	3.5
SERPINE-1	LEU-226	C22/C25	Hydrophobic contact	3.6
SERPINE-1	PRO-227	C27	Hydrophobic contact	4
SERPINE-1	PHE-208	C28	Hydrophobic contact	3.8
CXCL-8	VAL-85	C5	Hydrophobic contact	3.7
CXCL-8	LEU-88	C10	Hydrophobic contact	3.5
CXCL-8	LEU-92	C15	Hydrophobic contact	3.8
CXCL-8	LEU-96	C12	Hydrophobic contact	3.6
CXCL-8	LEU-99	C18	Hydrophobic contact	4
CXCL-8	LEU-124	C22	Hydrophobic contact	3.9
CXCL-8	LEU-125	C19	Hydrophobic contact	3.5
CXCL-8	VAL-128	C7	Hydrophobic contact	3.6
CXCL-8	LEU-167	C27	Hydrophobic contact	3.8
CXCL-8	TRP-170	C_ar	Hydrophobic contact	3.7
CXCL-8	LEU-174	C24	Hydrophobic contact	4.1
